# Supplementary material
Source: ML conference proceedings conference paper supplement (https://www.ecva.net/papers/eccv_2020/papers_ECCV/html/123630375_ECCV_2020_paper.php)
Supplement: Supplementary file 2 [file 123630375-supp.zip › README.txt]

2989-supp.mp4
codec: H.264 (x264)
codec download link: https://www.videolan.org/developers/x264.html
